1 **Transposable elements in the genome of the lichen-forming**  
2 **fungus *Umbilicaria pustulata*, and their distribution in**  
3 **different climate zones along elevation**

4

5

6 Francesco Dal Grande<sup>1,2\*</sup>, Veronique Jamilloux<sup>3</sup>, Nathalie Choisne<sup>3</sup>, Anjuli Calchera<sup>1</sup>, Malte

7 Petersen<sup>4</sup>, Meike Schulz<sup>1</sup>, Maria A. Nilsson<sup>1,2</sup>, Imke Schmitt<sup>1,2,5</sup>

8 <sup>1</sup> Senckenberg Biodiversity and Climate Research Centre (SBIK-F), Senckenberganlage 25,

9 60325 Frankfurt am Main, Germany

10 <sup>2</sup> LOEWE Centre for Translational Biodiversity Genomics (TBG), Senckenberganlage 25,

11 60325 Frankfurt am Main, Germany

12 <sup>3</sup> INRAE URGI, Centre de Versailles, bâtiment 18, Route de Saint Cyr, 78026 Versailles,

13 France

14 <sup>4</sup> Max Planck Institute of Immunobiology and Epigenetics, Stübeweg 51, 79108 Freiburg,

15 Germany

16 <sup>5</sup> Institut für Ökologie, Evolution und Diversität, Goethe-Universität Frankfurt, Max-von-

17 Laue-Str. 9, 60438 Frankfurt am Main, Germany

18

19

20 Corresponding author: Francesco Dal Grande, [francesco.dalgrande@senckenberg.de](mailto:francesco.dalgrande@senckenberg.de)

21

22

23

24

25

## 26 **Abstract**

27 **Background** Transposable elements (TEs) are an important source of genome plasticity  
28 across the tree of life. Accumulating evidence suggests that TEs may not be randomly  
29 distributed in the genome. Drift and natural selection are important forces shaping TE  
30 distribution and accumulation, acting directly on the TE element or indirectly on the host  
31 species. Fungi, with their multifaceted phenotypic diversity and relatively small genome size,  
32 are ideal models to study the role of TEs in genome evolution and their impact on the host's  
33 ecological and life history traits. Here we present an account of all TEs found in a high-  
34 quality reference genome of the lichen-forming fungus *Umbilicaria pustulata*, a macrolichen  
35 species comprising two climatic ecotypes: Mediterranean and cold-temperate. We trace the  
36 occurrence of the newly identified TEs in populations along three replicated elevation  
37 gradients using a Pool-Seq approach, to identify TE insertions of potential adaptive  
38 significance.

39 **Results** We found that TEs cover 21.26 % of the 32.9 Mbp genome, with LTR Gypsy  
40 and Copia clades being the most common TEs. Out of a total of 182 TE copies we identified  
41 28 insertions displaying consistent insertion frequency differences between the two host  
42 ecotypes across the elevation gradients. Most of the highly differentiated insertions were  
43 located near genes, indicating a putative function.

44 **Conclusions** This pioneering study into the content and climate niche-specific distribution  
45 of TEs in a lichen-forming fungus contributes to understanding the roles of TEs in fungal  
46 evolution. Particularly, it may serve as a foundation for assessing the impact of TE dynamics  
47 on fungal adaptation to the abiotic environment, and the impact of TE activity on the  
48 evolution and maintenance of a symbiotic lifestyle.

49

50 **Keywords:** TEs, lichens, terrestrial symbiosis, population genomics, environmental gradient

## 51 **Background**

52 Transposable elements (TEs) are DNA sequences that self-propagate across genomes (1). TEs  
53 are a ubiquitous component of almost all prokaryotic (2) and eukaryotic genomes such as  
54 plants (e.g., (3,4), fungi (5) and animals (6,7)). Eukaryotic TEs fall into two broad classes:  
55 DNA transposons that use a cut-and-paste mechanism for their transposition, and  
56 retrotransposons, that move via a reverse transcribed RNA intermediate via a copy-and-paste  
57 mechanism. TEs can be further classified into superfamilies and families based on specific  
58 sequence features (8–10). Most TEs present in eukaryotic genomes are genomic fossils, i.e.  
59 inactive remnants of once active copies (11,12). Their variation in copy number and size is  
60 responsible for much of the large differences in genome size observed even among closely  
61 related species (13–15). On the other hand, the most recent, likely active, transposable  
62 fraction of the repeatome – all repeated sequences except microsatellites – remains silenced  
63 under normal conditions. TEs are activated by ontogenetic factors and/or environmental cues  
64 (16,17). By their repetitive nature TEs provide hotspots for ectopic (non-homologous)  
65 recombination and induce chromosomal rearrangements as well as gene shuffling leading to  
66 loss of genomic portions or expansion of gene copy numbers. Being mobile, TEs can further  
67 locate in coding or regulatory regions, thus strongly affecting gene expression and gene  
68 structure and/or function. TEs can thus passively and actively impact genome plasticity, and  
69 extensively shape eukaryotic genome evolution (18,19).

70 TEs generate evolutionary novelty and respond to environmental change, indicating  
71 that they are likely to play a relevant role in adaptation (20–26). The relationship between TEs  
72 and environmental adaptation is complex, as both activation and repression of transposition in  
73 response to environmental changes have been reported (27–29). Most TEs remain silent and  
74 evolve in a neutral fashion, while only a minor fraction has adaptive roles (e.g., (30)). Several  
75 studies have suggested that the presence of a certain number of potentially active TEs may  
76 increase the genome’s ability to cope with environmental stress in a variety of ways, e.g. via

77 major genomic rearrangements (31), TE-driven creation of new regulatory networks involving  
78 genes in the TEs' proximity (32–35), and/or genome alteration via newly generated TE copies  
79 (36). As such, TEs can be a major source of intra-population genetic variation in response to  
80 environmental pressures (e.g., (37,38)). For instance, TE composition and/or copy number  
81 variation in response to micro-climatic conditions was reported for natural populations of wild  
82 barley, *Arabidopsis thaliana* (10,39), *A. arenosa* (40), and several *Brassicaceae* species (41).  
83 However, there is a general lack of understanding on how environment influences TE  
84 abundance and the activity of most TEs in most non-model species. The range and phenotypic  
85 consequences of the heritable mutations produced through TE mobilization remain largely  
86 unknown.

87 Fungi are a diverse group of organisms colonizing all habitats on Earth. Their  
88 remarkable diversity in terms of morphologies, life-styles, genome sizes, reproductive modes,  
89 and ecological niches makes them an ideal group for comparative genomics. Due to their  
90 relatively small genome size compared to plants and animals (e.g., 37 Mbp on average in  
91 Ascomycota and 46 Mbp in Basidiomycota; (42)), fungal genomes are easier to assemble and  
92 annotate. The past decade has seen an extraordinary increase in fungal genomic research, also  
93 in the area of TE research. The increased availability of high quality assemblies for a large  
94 numbers of fungi has enabled kingdom-wide comparative studies (5,43). The TE content of  
95 fungal genomes is variable, typically ranging from 0 to 30%, with up to 90% in the plant-  
96 pathogen *Blumeria graminis* (44,45). Retrotransposons with long terminal repeats (LTR) are  
97 the most abundant TE elements in fungal genomes. Several studies have shown that TEs are a  
98 major driving force for adaptive genome evolution in fungi (46), especially in fungal plant  
99 pathogens (43,47). In fact, animal-related and pathogenic fungi tend to have more TEs  
100 inserted into genes than fungi with other lifestyles, and may play an important role in effector  
101 gene diversification (48,49). Furthermore, TE content in fungi seems to be correlated with the  
102 mode of reproduction, with sexual fungi displaying a higher TE load (50). Surprisingly,

103 lichen-forming fungi, a group of highly diverse, ecologically obligate biotrophs, have been  
104 more or less completely neglected in TE research. Lichens are textbook examples of  
105 ecologically successful symbioses being the result of a tightly integrated relationship between  
106 a fungus, typically an ascomycete, and green algae and/or cyanobacteria (51). Lichens, due to  
107 their ability to tolerate environmental extremes, their specialized nutritional mode involving  
108 more or less strictly selected photosynthetic symbionts, and their varied morphologies and  
109 modes of reproduction represent an important missing piece of the puzzle in our attempt to  
110 understand the impact of TE activity on the evolutionary trajectory and architecture of fungal  
111 genomes.

112         Here we provide the first in-depth report on the abundance and distribution of TEs in  
113 the genome of a lichen-forming fungus, the ascomycete *Umbilicaria pustulata*. *U. pustulata* is  
114 a widespread macrolichen that grows attached to rocks from southern Europe to northern  
115 Scandinavia. Population genomics analyses revealed the presence of otherwise  
116 morphologically indistinguishable ecotypes in *U. pustulata*, i.e. intra-specific lineages,  
117 differentially adapted to the Mediterranean and cold-temperate climate zone, and interacting  
118 with different algal symbiont communities (52,53). The availability of a high-quality, PacBio-  
119 based reference assembly (54), together with marked genome-wide climatic niche  
120 differentiation data (52), and the possibility to sample this widespread and abundant species  
121 along replicated elevation gradients make *U. pustulata* an ideal model to study the TE content  
122 of a lichen-forming fungal genome and its potential link to intra-specific adaptive variation.  
123 Specifically, we asked the questions: i) How diverse is the repeatome in *U. pustulata*?; ii) To  
124 what extent does TE abundance vary between populations and across gradients?; iii) Are there  
125 ecotype-specific TE insertions, and if so, where are they located? To address these questions,  
126 we tracked the insertion frequencies of the newly annotated TEs in populations representing  
127 the Mediterranean and the cold-temperate ecotypes of the species. To disentangle general

128 trends from local differentiation, we sampled populations across three elevational gradients  
129 each encompassing the Mediterranean and the cold-temperate climate zone.

130

## 131 **Results**

### 132 *TE landscape in U. pustulata*

133 The repeatome spans 21.26 % of the *U. pustulata* genome length (Supplementary Table 1).

134 We annotated 119 TE consensus sequences for a total of 5,956 TE copies (704 of which full-  
135 length), 6,758 TE fragments, for a cumulative coverage of 6,996,427 bp (Table 2,

136 Supplementary Tables 1, 2). Retrotransposons (Class I) cover 15.6% of the genome of *U.*

137 *pustulata*, while DNA transposons (Class II) cover 3.5%. Among the Class I elements, Gypsy  
138 are the most represented (8.8% of the genome), followed by Copia elements (4.1%). Helitron

139 are the most abundant elements within the Class II (1.7%), followed by Terminal Inverted

140 Repeats (TIR; 1.2%).

141 TE copies have a median nucleotide identity of ~90% with their respective TE family

142 consensus sequence, ranging from 88.7% of Helitron (Class II) and 86.2% of LTR elements

143 (Class I) to 95.3% for PiggyBac (Class II) and 94% for LINE elements (Class I). The

144 distribution of TE copy identity to their family consensus sequences suggests recent activity

145 (Fig. 1, Supplementary Table 3).

146

### 147 *TE variation across U. pustulata populations*

148 We used the PoPoolationTE2 pipeline (55) on the *U. pustulata* reference genome (54) to

149 detect variations in TE frequencies in 15 natural populations across three replicated

150 elevational gradients.

151 After manual curation we retained 182 TE loci belonging to 12 superfamilies with a

152 minimum physical coverage of 16 (Table 3A, Supplementary Table 4). Of these, 68 insertions

153 were fixed across populations, i.e., they had a minimum frequency of 0.95 within each

154 population. Copia elements were the most frequently detected loci, representing 43% (49 loci)  
155 of all polymorphic insertions, followed by TIR elements (19.3%, 22 loci) (Table 3B).

156 We further compared population structure based on 447,470 genome-wide SNPs  
157 (dataset available at: <https://doi.org/10.6084/m9.figshare.14784579>) with the population  
158 divergence based on the variations of TE frequencies across populations. Both SNP-based and  
159 TE frequency-based ordinations show that populations can be grouped into two clearly  
160 distinct clusters, corresponding to the Mediterranean and cold-temperate ecotypes of the  
161 lichen-forming fungus *sensu* Dal Grande et al. (2017) (52) (Fig. 2).

162

### 163 *Variations of TE frequencies between ecotypes*

164 We identified TE loci that were highly differentiated (hdTEs) between the two ecotypes,  
165 because these loci might represent differential fixation/loss between ecotypes and have  
166 particular functional relevance. We identified 28 hdTEs (Table 3C). Of these, seven were  
167 exclusively found in the cold-temperate populations, 19 showed significantly higher  
168 frequency in the cold-temperate populations, and one was more abundant in the  
169 Mediterranean populations (a short Copia11 fragment in scaffold9\_123163). One Copia  
170 element was almost exclusively found in the two Spanish gradients (an almost full-length  
171 Copia11 copy in scaffold9\_1443709). This insertion was absent in the Mediterranean climatic  
172 zone and linearly increased in abundance with elevation.

173 The analysis of hdTEs between ecotypes showed an overrepresentation of Copia  
174 elements (16 loci, 57.1%). Among hdTEs we also found 4 TIR, 3 Helitron, 3 unknown, 1  
175 MITE and 1 PiggyBac element. Compared to all other TE insertions detected across  
176 populations, hdTEs were significantly more similar to their consensus sequence (Wilcoxon  
177 signed rank sum test  $p < 0.0001$  both in terms of sequence identity and length coverage).  
178 Eighteen hdTEs displayed sequence identity and length coverage towards their respective  
179 consensus sequence greater than 95%.

180

181 *Potential functional impact of TE insertions*

182 One hundred and three out of 114 polymorphic TE loci were inserted either inside a gene (27

183 TE loci, 25 in coding positions) or in a possible regulatory region (in the 1-kb region

184 surrounding a gene). These include all except two hdTEs (Supplementary Table 3).

185

## 186 **Discussion**

187 *The U. pustulata repeatome*

188 In this work we studied the content of transposable elements in the genome of the lichen-

189 forming fungus *U. pustulata*. Furthermore we analyzed the variation in TE insertion

190 frequency in populations representing two ecotypes distributed along three gradients spanning

191 the elevational range of the species, i.e. from the Mediterranean to cold-temperate climate

192 zones.

193 The repeat content in *U. pustulata* of 21% is rather high, compared to the repetitive

194 content in other fungal genomes, which typically ranges from 0 to 30% (56,57). It is also

195 higher than the predicted 15% TE content in another lichen-forming fungus, the

196 Eurotiomycete *Endocarpon pusillum* (58). The *U. pustulata* TE landscape is particularly rich

197 in retrotransposons (class I), especially the LTR retrotransposons Gypsy and Copia. This is a

198 general feature in fungi. The class I/class II genomic coverage ratio of 1.56 is in line with

199 what has been reported for Ascomycetes (0.78-4.23; (57)).

200 A substantial portion of the annotated TE copies are highly similar to their consensus,

201 which is often interpreted as a signature of rapid and recent bursts of TE activity in the

202 genome (e.g., (59)). Some TE families, such as Gypsy, on the other hand, displayed a broader

203 range of identity rate with their consensus, suggesting slower colonization of the *U. pustulata*

204 genome with these elements. In the absence of a molecular clock for *U. pustulata* it is,



205 however, difficult to precisely evaluate the time when the TE bursts possibly occurred, and  
206 how much time it took for the TEs to spread in the genome.

207         Population-level analyses of TE insertion frequencies in 15 populations of *U.*  
208 *pustulata* along three elevational gradients showed that a substantial part of the TEs can be  
209 considered as stable and fixed among populations. The clustering of populations based on the  
210 detected TE loci across the three gradients recapitulated almost exactly the population  
211 divergence based on genome-wide SNPs. This suggests that TE variation is mainly a result of  
212 drift between populations. The predominant evolutionary neutrality of TE variation has  
213 already been reported for other groups of organisms, such as nematodes (60), and other fungi  
214 (61).

215

216 *Ecotypic differentiation patterns of TE insertions and their potential functional impact*

217 Although adaptive TE insertions may be marginal compared to the overall repeatome  
218 dynamics (61), it is broadly recognized that TEs can play important regulatory roles and may  
219 contribute substantially to adaptive evolution in a variety of organisms (25,27,62,63). To  
220 identify TE insertions likely linked to climatic niche we studied loci where the TE frequencies  
221 were significantly differentiated by fungal ecotype, recurrently across the gradients (hdTEs).  
222 Overall, the high similarity of hdTEs to their consensus, the high variability in insertion  
223 frequency among populations – often linearly correlated with elevation – as well as the  
224 presence of gradient-specific insertions suggest that most of the hdTEs have recently been  
225 active in *U. pustulata* and are possibly still active, in particular in populations located in the  
226 cold-temperate climate zone.

227         Copia retrotransposons are the younger, most active elements of the *U. pustulata*  
228 repeatome. When Copia elements are in proximity of a gene, their regulatory role is typically  
229 exerted via regulation of gene expression by small RNAs, whereas when inserted within  
230 genes they can give rise to alternative splice variants (39,64). Genome expansion related to

231 retrotransposon amplification has been shown to occur in plants as a result of environmental  
232 adaptation (e.g., (65,66)). Global transcriptomic responses of Copia elements have been  
233 linked to heat stress in *Arabidopsis* spp. (41) and to various environmental stresses in  
234 *Eucalyptus* (67).

235         The identified hdTEs are prime candidates for future functional validation, e.g. via  
236 targeted transcriptomic and proteomic analyses, to test whether and how they influence  
237 adaptation of the lichen ecotype to different climatic niches. Particularly interesting in this  
238 regard could be the effects of TEs inserted near i) *genes involved in cell wall biosynthesis*: a  
239 Copia element near a putative GPI ethanolamine phosphate gene, controlling membrane-to-  
240 cell wall transfer of fungal adhesins by membrane-anchored transglycosidases (68); a TIR  
241 element near *Sac7*, a known activator of the small GTPase *RHO1*, which plays an essential  
242 role in the control of cell wall synthesis and organization of the actin cytoskeleton (69); ii)  
243 *genes involved in nutrient assimilation*: a Copia element near a NADP-specific glutamate  
244 dehydrogenase, a key enzyme in the assimilation of alternative nitrogen sources through  
245 ammonium (70); an Helitron element near an acid protease, whose secretion grants access to  
246 the carbon and mineral nutrients within proteins in the cells of the plant host in fungal  
247 endophytes (71); an unknown TE element inserted near an inositol-pentakisphosphate 2-  
248 kinase, an enzyme involved in the decomposition of organic phosphates, whose activity is  
249 modulated by environmental pH (72); iii) *genes involved in DNA repair mechanisms*: a Copia  
250 element near a putative DNA glycosylase, a gene involved in single-base excision repair  
251 mechanisms (73); iv) *genes involved in reproduction and environmental sensing*: an unknown  
252 TE element located near a conidiation-specific gene, which plays a role in balancing asexual  
253 and sexual development, a process regulated by several factors including light, temperature,  
254 humidity, and nutrient availability (74,75); v) *genes involved in secondary metabolism*: a  
255 PiggyBac element within a type-I polyketide gene cluster containing fixed nonsense  
256 mutations in its core biosynthetic gene only in the cold-temperate climate zone (76). TEs have

257 been previously identified as regulators of biosynthetic gene clusters in ascomycetes: the  
258 lower expression of the penicillin cluster in *Aspergillus nidulans* in the absence of *Pbla*  
259 element is a typical example (77).

260

### 261 *Outlook and future perspectives*

262 To our knowledge, this is the first in-depth report on a lichen repeatome, based on a highly  
263 contiguous and complete PacBio-based reference assembly. As more consensus TE libraries  
264 will become available in the future, as a result of improved sequencing and assembling  
265 technologies, the study of the repeatome of lichen-forming fungi will contribute key insights  
266 to the understanding of TE evolution, in particular in the following research areas:

267       1) *Role of reproductive mode on TE abundance and composition*: the dynamics in TE  
268 load according to the reproductive modes are still a matter of debate. Theoretically sexual  
269 reproduction may either facilitate TE accumulation by providing a means of spreading to all  
270 individuals in a population, or restrain TE accumulation via purifying selection (50). On the  
271 other hand, TE movements may constitute an important source of genome plasticity  
272 compatible with adaptive evolution in predominantly asexual species (60). Broad-scale  
273 comparative analyses of different sexual and asexual lineages in both nematodes and  
274 arthropods revealed no evidence for differences in TE load according to the reproductive  
275 modes (78,79). In fungi, however, a recent study suggests that sex might be responsible for  
276 the evolutionary success of TEs, by showing that TE loads decrease rapidly under asexual  
277 reproduction (50). Lichens are ideal study systems to address this question as congeneric,  
278 closely-related species often differ strikingly in their modes of reproduction (80,81). In our  
279 case, the sister species of the predominantly asexual *U. pustulata*, *U. hispanica*, reproduces  
280 mainly via sexual ascospores (82,83).

281       2) *Link between TE content and fungal life strategies*: TE count tends to be elevated in  
282 fungal plant symbionts (84). This is because recurrent adaptation to symbiosis seems to

283 involve relaxed genome control against duplications, TE proliferation and overall growth in  
284 genome size (63). About half of the currently described ascomycete species are involved in a  
285 lichen symbiotic association. This symbiotic lifestyle is believed to have arisen independently  
286 on several occasions in the evolution of Ascomycota (51). Comparing the repeatome of  
287 several unrelated lichen-forming fungi across the Fungi will provide important basal  
288 information to understand the evolutionary consequences of the symbiotic lifestyle on the  
289 fungal repeatome.

290       3) *Intra-specific variation and role of TEs in adaptive evolution*: several studies have  
291 shown that TE insertion patterns may differ between closely related fungal species occupying  
292 different niches (e.g., *Ustilago maydis* and *Sporisorium scitamineum*, (85)) or even between  
293 strains within the same species (*Magnaporthe grisea*, (86)). Many lichen species are  
294 characterized by wide ecological amplitudes, with distributional ranges spanning multiple  
295 climate zones. Furthermore, long-lived, sessile organisms such as lichens are more likely to  
296 experience strong selective pressures resulting in particularly abrupt genetic breaks between  
297 differentially selected populations over short distances (52,87). Lichens are therefore ideal  
298 systems to test the intra-specific differentiation in TE content and its potential role in affecting  
299 host fitness in different environments.

300       4) *TE content in lichen-associated photobionts*: Nearly 40 genera of green algae (~100  
301 species) have been reported from lichen symbioses. Studies on the TE content of green algae  
302 are scarce. While the TE abundance seems to be low in the green algal lineage (88,89), TEs  
303 may have important functional roles. For instance, TEs may have considerably contributed for  
304 gene regulatory sequences evolution in the green algal model species *Chlamydomonas*  
305 *reinhardtii* (89). TEs were reported as the major driver of chromosome specialization in two  
306 out of the 20 chromosomes in the marine algal *Ostreococcus tauri*, the smallest free-living  
307 eukaryote, possibly contributing to environmental niche adaptation and modulation of  
308 reproduction (90). Lichen photobionts are an interesting and highly diverse group of

309 unicellular eukaryotes to study in relation to TE diversity and evolution, especially  
310 considering the high symbiotic specificity, the high intra-specific diversity and strong  
311 environmental structuring found in many taxa (91–95).

312 In summary, our pioneering study into TE content and variation of a lichen-forming  
313 fungus provides valuable baseline data for future investigations. It opens up new perspectives  
314 for targeted analyses of the potential effect of TE dynamics on the evolution, fitness and  
315 adaptability of *U. pustulata*, and more generally of lichen-forming fungi, and other symbiotic  
316 systems.

317

## 318 **Methods**

### 319 *The genome of U. pustulata*

320 We used the genome assembly by Greshake Tsovaras et al. (54) as reference for TE prediction  
321 and annotation (accession VXIT01000000, BioProject: PRJNA464168). The haploid genome  
322 of *U. pustulata* is 32.9 Mbp long, with 43 scaffolds, and an N50 length of >1.8 Mbp.

323

### 324 *Pool-Seq sequencing of 15 U. pustulata populations*

325 To predict the copy insertion frequencies at TE loci across three elevational gradients, we  
326 used whole-genome sequencing data from pools of individuals from 15 natural lichen  
327 populations (100 lichen thalli per population). The 15 pools were collected along three  
328 elevational gradients in Southern Europe, i.e. Mount Limbara (Sardinia, Italy; 6 populations,  
329 IT), Sierra de Gredos (Sistema Central, Spain; 6 populations, ESii) and Talavera-Puerto de  
330 Pico (Sistema Central, Spain; 3 populations, ESi) (Table 1), as described in (96). Individuals  
331 were pooled in equimolar concentrations and each pool was sequenced on an Illumina HiSeq  
332 platform (2 x 100 bp for IT and ESi, 2 x 150 bp for ESii). The Pool-Seq data was quality-  
333 filtered using Trimmomatic v0.39 (97) with a length cutoff of 80 bp and a quality cutoff of 26  
334 in a window of 5 bp. Reads with N's were removed and an additional quality trimming using

335 a modified Mott algorithm was performed using the script *trim-fastq.pl* from the PoPoolation  
336 v1.2.2 pipeline (98). After trimming, the sequencing depth varied between 24.3 and 37.3  
337 million paired-end reads (Table 1).

338

339 *De novo TE prediction: building a U. pustulata TE-consensus library*

340 We used the TEdenovo pipeline from the REPET package v2.5 (99,100) to generate a TE-  
341 consensus library in *U. pustulata*. Briefly, the pipeline was used to perform a self-alignment  
342 of the reference genome to detect repeats, to cluster the repetitions, and to perform multiple  
343 alignments from the clustered repetitions to create consensus TE sequences. Consensus TEs  
344 were subsequently classified using the PASTEClassifier pipeline v2.0 (101), which follows  
345 Wicker's classification (8) using structural and homology-based information (i.e., terminal  
346 repeats, poly(A) tails, ORFs, tandem repeats, etc.) and the following databases:

347 'replibase20.05\_ntSeq\_cleaned\_TE.fa', 'replibase20.05\_aaSeq\_cleaned\_TE.fa' and

348 'ProfilesBankForREPET\_Pfam27.0\_GypsyDB.hmm'

349 (<https://urgi.versailles.inra.fr/download/repet>). We set the *minNbSeqPerGroup* parameter to 3  
350 (i.e.,  $2n+1$ ) because *U. pustulata* is haploid. All remaining parameters used for these analyses  
351 can be found in the TEdenovo and TEannot configuration files (Additional Files 1, 2).

352 We then performed extensive automated as well as manual curation of the TE  
353 consensus library to minimize redundancy as well as false positives. For this purpose, we first  
354 performed a two-step annotation (102) on contigs longer than 5 kbp, i.e. 1<sup>st</sup> round: steps 1 -  
355 taking all matches found by BLASTER, RepeatMasker and CENSOR, 2 - normal and  
356 random, 3 - using Grouper, Recon and Piler as clustering methods, 7 - removing  
357 duplicated/spurious fragments and applying the long join procedure for nested copies of TEs  
358 identified by the TEannot pipeline part. We only retained TE consensus sequences having at  
359 least one Full-Length Copy (FLC; i.e. length of fragments between 95% and 105% of

360 consensus length) to build the final TE library. This was followed by a 2<sup>nd</sup> round consisting of  
361 TEannot steps 1, 2, 3, 4, 5, 7 and 8 using the final TE library to annotate the genome.

362 Finally we performed a copy-divergence analysis of TE classes, based on Kimura  
363 distances by calculating Kimura 2-parameter divergence (103) between each TE copy and its  
364 consensus sequence using the utility scripts provided in the RepeatMasker package. These  
365 were also used to construct a TE landscape divergence plot by grouping copies within TE  
366 superfamilies and calculating the percentage of the genome occupied by each TE superfamily.  
367

368 *Evaluation of TE copy insertion frequencies across the different U. pustulata populations*

369 We used the PoPoolationTE2 v1.10.04 pipeline (55) to compute population-wide TE copy  
370 insertion frequencies of the curated TE library across the 15 populations described above. For  
371 this, we performed a 'joint' analysis using both quantitative and qualitative information  
372 extracted from paired-end reads mapping on the TE-annotated reference genome and a set of  
373 reference TEs to detect TE copy insertion frequencies in populations. Frequency values in this  
374 case correspond to the proportion of individuals in a population for which a TE copy is  
375 present at a given locus.

376 We used the curated *U. pustulata* TE library and the *U. pustulata* reference genome  
377 described above to produce the 'TE-merged' reference file (available at:  
378 <https://doi.org/10.6084/m9.figshare.14784579>) and the 'TE-hierarchy' file (Additional File 3)  
379 as follows. Sequences corresponding to the TE annotations were extracted and masked in the  
380 reference genome using the tools getfasta and maskfasta from the Bedtools suite (104),  
381 respectively. The resulting TE sequences were concatenated with the masked genome to form  
382 the 'TE-merged' reference. For every TE copy we also retrieved TE sequence name, family,  
383 and order to build the required 'TE-hierarchy' file. For each *U. pustulata* pool, we mapped  
384 forward and reverse reads separately against the 'TE-merged' reference using the local  
385 alignment algorithm BWA-SW v0.7 (105) with default parameters. The obtained SAM

386 alignment files were then converted to BAM files using samtools view v1.9 (106). Paired-end  
387 information was restored from the previous alignments using the *se2pe* (--sort) tool from  
388 PoPoolationTE2 v1.10.04. Using the *ppileup* tool from PoPoolationTE2 we then created a  
389 ppileup file (--map-qual 15) that summarizes, for every base of the genome, the number of PE  
390 reads spanning the site – i.e., physical coverage – as well as the structural status inferred from  
391 the paired-end reads covering the site (i.e., indicating whether one or both boundaries of a TE  
392 insertion are supported by significant physical coverage).

393 Heterogeneity in physical coverage among populations may lead to discrepancies in  
394 TE frequency estimation and in a substantial fraction of sample specific insertion false  
395 positives (55). Hence, to reduce the number of false positives, we normalized the physical  
396 coverage across the *U. pustulata* populations via a subsampling and a rescaling approach: In  
397 order to balance the loss of information with the homogeneity of the TE frequency we used  
398 the *stat-coverage* tool from PoPoolationTE2 to obtain information on the physical coverage in  
399 our dataset. We then used the *subsamplePpileup* tool (--target-coverage 16) to discard  
400 positions with a physical coverage below 16x and rescale the coverage of the remaining sites  
401 to that value.

402 We identified signatures of TE polymorphisms from the previously subsampled file  
403 using the *identifySignature* tool following the joint algorithm (--mode joint; --min-count 3; --  
404 signature-window minimumSampleMedian; --min-valley minimumSampleMedian). Then,  
405 for each identified site, we estimated TE frequencies in each pool using the *frequency* tool.  
406 Eventually, we paired up the signatures of TE polymorphisms using *pairupSignatures* tool (--  
407 min-distance 100; --max-distance 500), yielding a final list of TE loci in the reference genome  
408 with their frequencies for each pool. Each TE insertion was manually checked using IGV v2.5  
409 (107). TE loci predictions with unusually high read coverage, i.e. resulting from spurious  
410 alignments to unmasked repeats, were discarded from further analysis. The stringent filters  
411 applied here, together with the inability of PoPoolationTE2 to detect nested TEs (55), may



412 lead to an underestimation of TE activity across *U. pustulata* populations. On the positive  
413 side, however, such a conservative approach almost certainly eliminates false insertions.

414 TE loci supported by significant physical coverage were considered polymorphic if  
415 they had a frequency difference of at least 0.05% among populations. TE loci with  
416 frequencies  $\geq 0.95\%$  were considered as fixed in the populations. The similarity of populations  
417 based on their TE composition was investigated using nonmetric multidimensional scaling  
418 (NMDS) on all detected TE insertion frequencies using the function metaMDS from the  
419 vegan package (108) for R (109).

420

421 *Identification of TE loci significantly differentiated between U. pustulata ecotypes*

422 To identify highly differentiated TE loci (hdTEs) between *U. pustulata* ecotypes we  
423 performed a differential abundance analysis using the microbiomeSeq (110) and DeSeq2  
424 (111) R packages. For this purpose, we contrasted the normalized relative abundances of all  
425 TE copy insertions in DeSeq2 to detect differentially abundant TE copy insertions (at  $\alpha =$   
426 0.01) between populations representing the Mediterranean (populations IT1-4, ESii1, ESi1)  
427 and the cold-temperate (IT6, ESii3-6, ESi2-3) ecotypes. From the analysis we excluded  
428 populations IT5 and ESii2, because they represent admixed populations of both ecotypes (96).

429

430 *Functional characterization*

431 To identify genes potentially impacted by TE insertions, i.e. genes overlapping with TEs or in  
432 the proximity of TEs (1 kbp up- or downstream each TE insertion), we cross-referenced the  
433 TE annotation file with the gene annotation file (54) using the *intersect* tool of the Bedtools  
434 suite (104).

435

436 *Population structure based on genome-wide SNPs*

437 Population structure based on genome-wide single-nucleotide polymorphisms (SNPs), i.e. the  
438 positional relations among populations based on their genetic distances, was detected by  
439 analyzing pairwise quantile distance matrices (0.975, 0.75, 0.5, 0.25, 0.025) based on the  
440 pairwise fixation index ( $F_{ST}$ ) among all populations using a three-way generalization of  
441 classical multidimensional scaling (DISTATIS; (112)). Briefly, we used the sorted, duplicate-  
442 removed BAM files of reads mapped to the *U. pustulata* reference genome. High-quality (i.e.  
443 after removing duplicated reads and genomic indels) SNPs were called using SAMtools  
444 mpileup and normalized to a uniform coverage of 30 across all populations with PoPoolation2  
445 (113). For this we used the synchronized mpileup file (i.e. ‘sync’ file containing the allele  
446 frequencies for every population at every base in the reference genome) and the script  
447 *subsample-synchronized.pl* (--without-replacement), excluding positions with a coverage  
448 exceeding the 2% of the empirical coverage distribution of each pool. Genetic differentiation  
449 ( $F_{ST}$ ) was calculated with *fst-sliding.pl* in PoPoolation2 on the subsampled sync file. We only  
450 considered SNPs with a minimum read count of 4 and a minimum mapping quality of 20. A  
451 more detailed description of the methods can be found in (96).

452

## 453 **Declarations**

454 **Ethics approval and consent to participate** Not applicable.

455 **Consent for publication** Not applicable.

456 **Availability of data and materials** Raw sequences are available in the SRA archive under  
457 Bioproject [xxx]. The datasets supporting the conclusions of this article are available in the  
458 Figshare repository, <https://doi.org/10.6084/m9.figshare.14784579>.

459 **Competing interests** The authors declare that they have no competing interests.

460 **Funding** This study was funded by the Centre for Translational Biodiversity Genomics  
461 (LOEWE-TBG) as part of the program “LOEWE—Landes-Offensive zur Entwicklung

462 Wissenschaftlich-ökonomischer Exzellenz“ of Hesse’s Ministry of Higher Education,  
463 Research, and the Arts.

464 **Authors' contributions** FDG and IS conceived the idea to the study. FDG, VC, NC, AC,  
465 MP, and MS analyzed the data. FDG, MP, MN, and IS interpreted the data. FDG produced the  
466 figures and wrote the manuscript. All authors read, approved, and commented on the  
467 manuscript.

468 **Acknowledgements** We thank Jürgen Otte (Frankfurt) for laboratory assistance, and Ann-  
469 Marie Waldvogel (Cologne) for stimulating discussions during the early phase of this project.  
470 Claus Weiland (Frankfurt) provided invaluable support with software installation.

471

## 472 **References**

- 473 1. Craig N, Chandler M, Gellert M, Lambowitz A, Rice P, SB S. Mobile DNA III. 3rd ed.  
474 American Society For Microbiology (ASM), editor. Washington, DC; 2015.
- 475 2. Sawyer S, Hartl D. Distribution of transposable elements in prokaryotes. *Theor Popul*  
476 *Biol.* 1986;30:1–16.
- 477 3. Bennetzen JL. Transposable elements, gene creation and genome rearrangement in  
478 flowering plants. *Curr Opin Genet Dev.* 2005;15:621–7.
- 479 4. Staton SE, Burke JM. Evolutionary transitions in the Asteraceae coincide with marked  
480 shifts in transposable element abundance. *BMC Genomics.* 2015;16:623.
- 481 5. Daboussi M-J, Capy P. Transposable elements in filamentous fungi. *Annu Rev*  
482 *Microbiol.* 2003;57:275–99.
- 483 6. Chalopin D, Naville M, Plard F, Galiana D, Volff J-N. Comparative analysis of  
484 transposable elements highlights mobilome diversity and evolution in vertebrates.  
485 *Genome Biol Evol.* 2015;7:567–80.
- 486 7. Petersen M, Armisen D, Gibbs RA, Hering L, Khila A, Mayer G, et al. Diversity and  
487 evolution of the transposable element repertoire in arthropods with particular reference  
488 to insects. *BMC Ecol Evol.* 2019;19:11.
- 489 8. Wicker T, Sabot F, Hua-Van A, Bennetzen JL, Capy P, Chalhoub B, et al. A unified  
490 classification system for eukaryotic transposable elements. *Nat Rev Genet.*  
491 2007;8:973–82.

- 492 9. Kapitonov V V., Jurka J. A universal classification of eukaryotic transposable elements  
493 implemented in Repbase. *Nat Rev Genet.* 2008;9:411–2.
- 494 10. Quadrana L, Etcheverry M, Gilly A, Caillieux E, Madoui MA, Guy J, et al.  
495 Transposition favors the generation of large effect mutations that may facilitate rapid  
496 adaption. *Nat Commun.* 2019;10:1–10.
- 497 11. Smit AFA. Interspersed repeats and other mementos of transposable elements in  
498 mammalian genomes. *Curr Opin Genet Dev.* 1999;9:657–63.
- 499 12. Lanciano S, Cristofari G. Measuring and interpreting transposable element expression.  
500 *Nat Rev Genet.* 2020;21:721–36.
- 501 13. Boulesteix M, Weiss M, Biéumont C. Differences in genome size between closely  
502 related species: The *Drosophila melanogaster* species subgroup. *Mol Biol Evol.*  
503 2006;23:162–7.
- 504 14. Hawkins JS, Kim HR, Nason JD, Wing RA, Wendel JF. Differential lineage-specific  
505 amplification of transposable elements is responsible for genome size variation in  
506 *Gossypium*. *Genome Res.* 2006;16:1252–61.
- 507 15. Klein SJ, O’Neill RJ. Transposable elements: genome innovation, chromosome  
508 diversity, and centromere conflict. *Chromosom Res.* 2018;26:5–23.
- 509 16. Makarevitch I, Waters AJ, West PT, Stitzer M, Hirsch CN, Ross-Ibarra J, et al.  
510 Transposable elements contribute to activation of maize genes in response to abiotic  
511 stress. *PLOS Genet.* 2015;11:e1004915.
- 512 17. Rey O, Danchin E, Mirouze M, Loot C, Blanchet S. Adaptation to global change: a  
513 transposable element–epigenetics perspective. *Trends Ecol Evol.* 2016;31:514–26.
- 514 18. Feschotte C, Pritham EJ. DNA transposons and the evolution of eukaryotic genomes.  
515 *Annu Rev Genet.* 2007;41:331–68.
- 516 19. Pritham EJ. Transposable elements and factors influencing their success in eukaryotes.  
517 *J Hered.* 2009/08/07. 2009;100:648–55.
- 518 20. Biéumont C, Vieira C. Genetics: Junk DNA as an evolutionary force. *Nature.*  
519 2006;443:521–4.
- 520 21. Schmidt AL, Anderson LM. Repetitive DNA elements as mediators of genomic change  
521 in response to environmental cues. *Biol Rev.* 2006;81:531–43.
- 522 22. Oliver KR, Greene WK. Transposable elements: powerful facilitators of evolution.  
523 *BioEssays.* 2009 Jul 1;31:703–14.
- 524 23. Hua-Van A, Le Rouzic A, Boutin TS, Filée J, Capy P. The struggle for life of the  
525 genome’s selfish architects. *Biol Direct.* 2011;6:19.
- 526 24. Casacuberta E, González J. The impact of transposable elements in environmental  
527 adaptation. *Mol Ecol.* 2013;22:1503–17.

- 528 25. Hof AE van't, Campagne P, Rigden DJ, Yung CJ, Lingley J, Quail MA, et al. The  
529 industrial melanism mutation in British peppered moths is a transposable element.  
530 Nature. 2016;534:102–5.
- 531 26. Schrader L, Schmitz J. The impact of transposable elements in adaptive evolution. Mol  
532 Ecol. 2019;28:1537–49.
- 533 27. González J, Petrov DA. The adaptive role of transposable elements in the *Drosophila*  
534 genome. Gene. 2009;448:124–33.
- 535 28. Horváth V, Merenciano M, González J. Revisiting the relationship between  
536 transposable elements and the eukaryotic stress response. Trends Genet. 2017;33:832–  
537 41.
- 538 29. Dubin MJ, Mittelsten Scheid O, Becker C. Transposons: a blessing curse. Curr Opin  
539 Plant Biol. 2018;42:23–9.
- 540 30. Arkhipova IR. Neutral theory, transposable elements, and eukaryotic genome  
541 evolution. Mol Biol Evol. 2018;35:1332–7.
- 542 31. Maumus F, Allen AE, Mhiri C, Hu H, Jabbari K, Vardi A, et al. Potential impact of  
543 stress activated retrotransposons on genome evolution in a marine diatom. BMC  
544 Genomics. 2009;10:1–19.
- 545 32. Naito K, Cho E, Yang G, Campbell MA, Yano K, Okumoto Y, et al. Dramatic  
546 amplification of a rice transposable element during recent domestication. Proc Natl  
547 Acad Sci. 2006;103:17620–5.
- 548 33. Guo Y, Levin HL. High-throughput sequencing of retrotransposon integration provides  
549 a saturated profile of target activity in *Schizosaccharomyces pombe*. Genome Res.  
550 2010;20:239–48.
- 551 34. Ito H, Gaubert H, Bucher E, Mirouze M, Vaillant I, Paszkowski J. An siRNA pathway  
552 prevents transgenerational retrotransposition in plants subjected to stress. Nature.  
553 2011;472:115–9.
- 554 35. Servant G, Pinson B, Tchalikian-Cosson A, Couplier F, Lemoine S, Pennetier C, et al.  
555 *Tye7* regulates yeast *Ty1* retrotransposon sense and antisense transcription in response  
556 to adenylic nucleotides stress. Nucleic Acids Res. 2012;40:5271–82.
- 557 36. Dai J, Xie W, Brady TL, Gao J, Voytas DF. Phosphorylation regulates integration of the  
558 yeast *Ty5* retrotransposon into heterochromatin. Mol Cell. 2007;27:289–99.
- 559 37. Lockton S, Ross-Ibarra J, Gaut BS. Demography and weak selection drive patterns of  
560 transposable element diversity in natural populations of *Arabidopsis lyrata*. Proc Natl  
561 Acad Sci U S A. 2008;105:13965–70.
- 562 38. Stewart C, Kural D, Strömberg MP, Walker JA, Konkel MK, Stütz AM, et al. A  
563 comprehensive map of mobile element insertion polymorphisms in humans. PLOS  
564 Genet. 2011;7:e1002236.

- 565 39. Li ZW, Hou XH, Chen JF, Xu YC, Wu Q, Gonzalez J, et al. Transposable elements  
566 contribute to the adaptation of *Arabidopsis thaliana*. *Genome Biol Evol*.  
567 2018;10:2140–50.
- 568 40. Wos G, Choudhury RR, Kolář F, Parisod C. Transcriptional activity of transposable  
569 elements along an elevational gradient in *Arabidopsis arenosa*. *Mob DNA*. 2021;12:1–  
570 12.
- 571 41. Pietzenuk B, Markus C, Gaubert H, Bagwan N, Merotto A, Bucher E, et al. Recurrent  
572 evolution of heat-responsiveness in Brassicaceae COPIA elements. *Genome Biol*.  
573 2016;17:1–15.
- 574 42. Mohanta TK, Bae H. The diversity of fungal genome. *Biol Proced Online*. 2015;17:8.
- 575 43. Lorrain C, Feurtey A, Möller M, Hauelsen J, Stukenbrock E. Dynamics of transposable  
576 elements in recently diverged fungal pathogens: lineage-specific transposable element  
577 content and efficiency of genome defenses. *G3 Genes|Genomes|Genetics*.  
578 2021;11:jkab068.
- 579 44. Cuomo CA, Güldener U, Xu J-R, Trail F, Turgeon BG, Di Pietro A, et al. The *Fusarium*  
580 *graminearum* genome reveals a link between localized polymorphism and pathogen  
581 specialization. *Science* 2007;317:1400–2.
- 582 45. Frantzeskakis L, Kracher B, Kusch S, Yoshikawa-Maekawa M, Bauer S, Pedersen C, et  
583 al. Signatures of host specialization and a recent transposable element burst in the  
584 dynamic one-speed genome of the fungal barley powdery mildew pathogen. *BMC*  
585 *Genomics*. 2018;19:1–23.
- 586 46. Oggenfuss U, Badet T, Wicker T, Hartmann FE, Singh NK, Abraham LN, et al. A  
587 population-level invasion by transposable elements triggers genome expansion in a  
588 fungal pathogen. *bioRxiv*. 2021;2020.02.11.944652.
- 589 47. Grandaubert J, Lowe RGT, Soyer JL, Schoch CL, Van De Wouw AP, Fudal I, et al.  
590 Transposable element-assisted evolution and adaptation to host plant within the  
591 *Leptosphaeria maculans-Leptosphaeria biglobosa* species complex of fungal  
592 pathogens. *BMC Genomics*. 2014;15:1–27.
- 593 48. Fouché S, Plissonneau C, Croll D. The birth and death of effectors in rapidly evolving  
594 filamentous pathogen genomes. *Curr Opin Microbiol*. 2018;46:34–42.
- 595 49. Fokkens L, Shahi S, Connolly LR, Stam R, Schmidt SM, Smith KM, et al. The multi-  
596 speed genome of *Fusarium oxysporum* reveals association of histone modifications  
597 with sequence divergence and footprints of past horizontal chromosome transfer  
598 events. *bioRxiv*. 2018;465070.
- 599 50. Bast J, Jaron KS, Schuseil D, Roze D, Schwander T. Asexual reproduction reduces  
600 transposable element load in experimental yeast populations. *Coop G, Tautz D, Coop G,*  
601 *Charlesworth B, editors. Elife*. 2019;8:e48548.

- 602 51. Lutzoni F, Pagel M, Reeb V. Major fungal lineages are derived from lichen symbiotic  
603 ancestors. *Nature*. 2001;411:937–40.
- 604 52. Dal Grande F, Sharma R, Meiser A, Rolshausen G, Büdel B, Mishra B, et al. Adaptive  
605 differentiation coincides with local bioclimatic conditions along an elevational cline in  
606 populations of a lichen-forming fungus. *BMC Evol Biol*. 2017;17:93.
- 607 53. Dal Grande F, Rolshausen G, Divakar PKPK, Crespo A, Otte J, Schleuning M, et al.  
608 Environment and host identity structure communities of green algal symbionts in  
609 lichens. *New Phytol*. 2018;217:277–89.
- 610 54. Greshake Tzovaras BG, Segers FHID, Bicker A, Dal Grande F, Otte J, Anvar SY, et al.  
611 What is in *Umbilicaria pustulata*? A metagenomic approach to reconstruct the holo-  
612 genome of a lichen. *Genome Biol Evol*. 2020;12:309–24.
- 613 55. Kofler R, Gómez-Sánchez D, Schlötterer C. PoPoolationTE2: Comparative population  
614 genomics of transposable elements using Pool-Seq. *Mol Biol Evol*. 2016;33:2759–64.
- 615 56. Cuomo CA, Birren BWBT-M in E. Chapter 34 - The Fungal Genome Initiative and  
616 lessons learned from genome sequencing. In: *Guide to yeast genetics: functional*  
617 *genomics, proteomics, and other systems analysis*. Academic Press; 2010. p. 833–55.
- 618 57. Castanera R, López-Varas L, Borgognone A, LaButti K, Lapidus A, Schmutz J, et al.  
619 Transposable elements versus the fungal genome: impact on whole-genome  
620 architecture and transcriptional profiles. *PLoS Genet*. 2016;12:1–27.
- 621 58. Wang Y-Y, Liu B, Zhang X-LX-Y, Zhou Q, Zhang T, Li H, et al. Genome  
622 characteristics reveal the impact of lichenization on lichen-forming fungus *Endocarpon*  
623 *pusillum* Hedwig (Verrucariales, Ascomycota). *BMC Genomics*. 2014;15:34.
- 624 59. Lerat E, Goubert C, Guirao-Rico S, Merenciano M, Dufour AB, Vieira C, et al.  
625 Population-specific dynamics and selection patterns of transposable element insertions  
626 in European natural populations. *Mol Ecol*. 2019;28:1506–22.
- 627 60. Kozłowski DKL, Hassanaly-Goulamhousen R, Rocha M Da, Koutsovoulos GD,  
628 Bailly-Bechet M, Danchin EGJ. Transposable elements are an evolutionary force  
629 shaping genomic plasticity in the parthenogenetic root-knot nematode *Meloidogyne*  
630 *incognita*. *Evol Appl*. 2021;00:1–23.
- 631 61. Muszewska A, Steczkiewicz K, Stepniewska-Dziubinska M, Ginalski K. Transposable  
632 elements contribute to fungal genes and impact fungal lifestyle. *Sci Rep*. 2019;9:1–10.
- 633 62. Rebollo R, Romanish MT, Mager DL. Transposable Elements: An abundant and natural  
634 source of regulatory sequences for host genes. *Annu Rev Genet*. 2012;46:21–42.
- 635 63. Muszewska A, Steczkiewicz K, Stepniewska-Dziubinska M, Ginalski K. Cut-and-paste  
636 transposons in fungi with diverse lifestyles. *Genome Biol Evol*. 2017;9:3463–77.
- 637 64. Bourque G, Burns KH, Gehring M, Gorbunova V, Seluanov A, Hammell M, et al. Ten  
638 things you should know about transposable elements. *Genome Biol*. 2018;19:1–12.



- 639 65. Kawakami T, Dhakal P, Katterhenry AN, Heatherington CA, Ungerer MC.  
640 Transposable element proliferation and genome expansion are rare in contemporary  
641 sunflower hybrid populations despite widespread transcriptional activity of LTR  
642 retrotransposons. *Genome Biol Evol.* 2011;3:156–67.
- 643 66. Lee J, Waminal NE, Choi H Il, Perumal S, Lee SC, Nguyen VB, et al. Rapid  
644 amplification of four retrotransposon families promoted speciation and genome size  
645 expansion in the genus *Panax*. *Sci Rep.* 2017;7:1–9.
- 646 67. Marcon HS, Domingues DS, Silva JC, Borges RJ, Matioli FF, de Mattos Fontes MR, et  
647 al. Transcriptionally active LTR retrotransposons in *Eucalyptus* genus are differentially  
648 expressed and insertionally polymorphic. *BMC Plant Biol.* 2015;15:1–16.
- 649 68. Essen LO, Vogt MS, Mösch HU. Diversity of GPI-anchored fungal adhesins. *Biol*  
650 *Chem.* 2020;401:1389–405.
- 651 69. Schmidt A, Schmelzle T, Hall MN. The *RHO1-GAPs* *SAC7*, *BEM2* and *BAG7* control  
652 distinct *RHO1* functions in *Saccharomyces cerevisiae*. *Mol Microbiol.* 2002;45:1433–  
653 41.
- 654 70. Downes DJ, Davis MA, Kreutzberger SD, Taig BL, Todd RB. Regulation of the  
655 NADP-glutamate dehydrogenase gene *gdhA* in *Aspergillus nidulans* by the  
656 Zn(II)2Cys6 transcription factor LeuB. *Microbiol.* 2013;159:2467–80.
- 657 71. Mayerhofer MS, Fraser E, Kernaghan G. Acid protease production in fungal root  
658 endophytes. *Mycologia.* 2015;107:1–11.
- 659 72. Williams SP, Gillaspay GE, Perera IY. Biosynthesis and possible functions of inositol  
660 pyrophosphates in plants. *Front Plant Sci.* 2015;6:67.
- 661 73. Krokan HE, Bjørås M. Base excision repair. *Cold Spring Harb Perspect Biol.*  
662 2013;5:a012583.
- 663 74. Fabro G, Alvarez ME. Loss of compatibility might explain resistance of the  
664 *Arabidopsis thaliana* accession Te-0 to *Golovinomyces cichoracearum*. *BMC Plant*  
665 *Biol.* 2012;12:143.
- 666 75. Wang Z, Miguel-Rojas C, Lopez-Giraldez F, Yarden O, Trail F, Townsend JP.  
667 Metabolism and development during conidial germination in response to a carbon-  
668 nitrogen-rich synthetic or a natural source of nutrition in *Neurospora crassa*. *MBio.*  
669 2019;10:1–17.
- 670 76. Singh G, Calchera A, Schulz M, Drechsler M, Bode HB, Schmitt I, Dal Grande F.  
671 Climate-specific biosynthetic gene clusters in populations of a lichen-forming fungus.  
672 *Environ Microbiol.* 2021; <https://doi.org/10.1111/1462-2920.15605>
- 673 77. Shaaban M, Palmer JM, El-Nagggar WA, El-Sokkary MA, Habib E-SE, Keller NP.  
674 Involvement of transposon-like elements in penicillin gene cluster regulation. *Fungal*  
675 *Genet Biol.* 2010;47:423–32.



- 676 78. Bast J, Schaefer I, Schwander T, Maraun M, Scheu S, Kraaijeveld K. No Accumulation  
677 of transposable elements in asexual arthropods. *Mol Biol Evol.* 2016;33:697–706.
- 678 79. Szitenberg A, Cha S, Opperman CH, Bird DM, Blaxter ML, Lunt DH. Genetic drift,  
679 not life history or RNAi, determine long-term evolution of transposable elements.  
680 *Genome Biol Evol.* 2016;8:2964–78.
- 681 80. Poelt J. Das Konzept der Artenpaare bei den Flechten. Vor aus dem Gesamtgebiet der  
682 Bot NF Deutsch Bot Ges. 1970;4:187–98.
- 683 81. Singh G, Dal Grande F, Cornejo C, Schmitt I, Scheidegger C. Genetic basis of self-  
684 incompatibility in the lichen-forming fungus *Lobaria pulmonaria* and skewed  
685 frequency distribution of mating-type idiomorphs: implications for conservation. *PLoS*  
686 *One.* 2012;7:e51402.
- 687 82. Sancho LG, Crespo A. *Lasallia hispanica* and related species. *Lichenol.* 1989;21:45–  
688 58.
- 689 83. Dal Grande F, Meiser A, Greshake Tzovaras B, Otte J, Ebersberger I, Schmitt I. The  
690 draft genome of the lichen-forming fungus *Lasallia hispanica* (Frey) Sancho & A.  
691 Crespo. *Lichenologist.* 2018;50:329–40.
- 692 84. Hess J, Skrede I, Wolfe BE, Butti K La, Ohm RA, Grigoriev I V., et al. Transposable  
693 element dynamics among asymbiotic and ectomycorrhizal *Amanita* fungi. *Genome*  
694 *Biol Evol.* 2014;6:1564–78.
- 695 85. Dutheil JY, Mannhaupt G, Schweizer G, Sieber CMK, Münsterkötter M, Güldener U, et  
696 al. A tale of genome compartmentalization: The evolution of virulence clusters in smut  
697 fungi. *Genome Biol Evol.* 2016;8:681–704.
- 698 86. Shirke MD, Mahesh HB, Gowda M. Genome-wide comparison of *Magnaporthe*  
699 species reveals a host-specific pattern of secretory proteins and transposable elements.  
700 *PLoS One.* 2016;11:e0162458.
- 701 87. Chen JM, Werth S, Sork VL. Comparison of phylogeographical structures of a lichen-  
702 forming fungus and its green algal photobiont in western North America. *J Biogeogr.*  
703 2016;43:932–43.
- 704 88. Worden AZ, Lee J-H, Mock T, Rouzé P, Simmons MP, Aerts AL, et al. Green evolution  
705 and dynamic adaptations revealed by genomes of the marine picoeukaryotes  
706 *Micromonas*. *Science.* 2009;324:268–72.
- 707 89. Philippsen GS, Avaca-Crusca JS, Araujo APU, DeMarco R. Distribution patterns and  
708 impact of transposable elements in genes of green algae. *Gene.* 2016;594:151–9.
- 709 90. Derelle E, Ferraz C, Rombauts S, Rouzé P, Worden AZ, Robbens S, et al. Genome  
710 analysis of the smallest free-living eukaryote *Ostreococcus tauri* unveils many unique  
711 features. *Proc Natl Acad Sci U S A.* 2006;103:11647–52.

- 712 91. Fernández-Mendoza F, Domaschke S, García M a, Jordan P, Martín MP, Printzen C.  
713 Population structure of mycobionts and photobionts of the widespread lichen *Cetraria*  
714 *aculeata*. Mol Ecol. 2011;20:1208–32.
- 715 92. Widmer I, Dal Grande F, Excoffier L, Holderegger R, Keller C, Mikryukov VSVS, et  
716 al. European phylogeography of the epiphytic lichen fungus *Lobaria pulmonaria* and  
717 its green algal symbiont. Mol Ecol. 2012;21:5827–44.
- 718 93. Dal Grande F, Beck A, Cornejo C, Singh G, Cheenacharoen S, Nelsen MP, et al.  
719 Molecular phylogeny and symbiotic selectivity of the green algal genus  
720 *Dictyochloropsis* s.l. (Trebouxiophyceae): A polyphyletic and widespread group  
721 forming photobiont-mediated guilds in the lichen family Lobariaceae. New Phytol.  
722 2014;202:455–70.
- 723 94. Werth S, Sork VL. Ecological specialization in *Trebouxia* (Trebouxiophyceae)  
724 photobionts of *Ramalina menziesii* (Ramalinaceae) across six range-covering  
725 ecoregions of western North America. Am J Bot. 2014;101:1127–40.
- 726 95. Rolshausen G, Dal Grande F, Sadowska-Deś ADAD, Otte J, Schmitt I. Quantifying the  
727 climatic niche of symbiont partners in a lichen symbiosis indicates mutualist-mediated  
728 niche expansions. Ecography. 2018;41:1380–92.
- 729 96. Dal Grande F, Sharma R, Meiser A, Rolshausen G, Büdel B, Mishra B, et al. Adaptive  
730 differentiation coincides with local bioclimatic conditions along an elevational cline in  
731 populations of a lichen-forming fungus. BMC Evol Biol. 2017;17:93.
- 732 97. Bolger AM, Lohse M, Usadel B. Trimmomatic: a flexible trimmer for Illumina  
733 sequence data. Bioinformatics. 2014;30:2114–20.
- 734 98. Kofler R, Orozco-terWengel P, De Maio N, Pandey RV, Nolte V, Futschik A, et al.  
735 PoPoolation: a toolbox for population genetic analysis of next generation sequencing  
736 data from pooled individuals. PLoS One. 2011;6:e15925.
- 737 99. Quesneville H, Bergman CM, Andrieu O, Autard D, Nouaud D, Ashburner M, et al.  
738 Combined evidence annotation of transposable elements in genome sequences. PLoS  
739 Comput Biol. 2005;1:0166–75.
- 740 100. Flutre T, Duprat E, Feuillet C, Quesneville H. Considering transposable element  
741 diversification in de novo annotation approaches. PLoS One. 2011;6:e16526.
- 742 101. Hoede C, Arnoux S, Moisset M, Chaumier T, Inizan O, Jamilloux V, et al. PASTEC: An  
743 automatic transposable element classification tool. PLoS One. 2014;9:1–6.
- 744 102. Jamilloux V, Daron J, Choulet F, Quesneville H. De novo annotation of transposable  
745 elements: tackling the fat genome issue. Proc IEEE. 2017;105:474–81.
- 746 103. Kimura M. A simple method for estimating evolutionary rates of base substitutions  
747 through comparative studies of nucleotide sequences. J Mol Evol. 1980;16:111–20.

- 748 104. Quinlan AR, Hall IM. BEDTools: a flexible suite of utilities for comparing genomic  
749 features. *Bioinformatics*. 2010;26:841–2.
- 750 105. Li H, Durbin R. Fast and accurate short read alignment with Burrows-Wheeler  
751 transform. *Bioinformatics*. 2009;25:1754–60.
- 752 106. Li H, Handsaker B, Wysoker A, Fennell T, Ruan J, Homer N, et al. The sequence  
753 alignment/map format and SAMtools. *Bioinformatics*. 2009;25:2078–9.
- 754 107. Thorvaldsdóttir H, Robinson JT, Mesirov JP. Integrative Genomics Viewer (IGV):  
755 high-performance genomics data visualization and exploration. *Brief Bioinform*.  
756 2013;14:178–92.
- 757 108. Dixon P. VEGAN, a package of R functions for community ecology. *J Veg Sci*.  
758 2003;14:927–30.
- 759 109. R Core Team. R: A language and environment for statistical computing. Vienna,  
760 Austria; 2020.
- 761 110. Paulson JN, Stine OC, Bravo HC, Pop M. Differential abundance analysis for microbial  
762 marker-gene surveys. *Nat Methods*. 2013;10:1200–2.
- 763 111. Love M, Anders S, Huber W. Differential analysis of count data—the DESeq2 package.  
764 *Genome Biol*. 2014;11:R106.
- 765 112. Abdi H, O’Toole AJ, Valentin D, Edelman B. DISTATIS: the analysis of multiple  
766 distance matrices. In: 2005 IEEE Computer Society Conference on Computer Vision  
767 and Pattern Recognition (CVPR’05) - Workshops. IEEE; 2005.
- 768 113. Kofler R, Pandey RV, Schlötterer C. PoPoolation2: identifying differentiation between  
769 populations using sequencing of pooled DNA samples (Pool-Seq). *Bioinformatics*.  
770 2011;27:3435–6.

771

772

773

774

775

776

777

778

779

780

781 **Figure Legends**

782 **Fig. 1** Repeat landscape plot in *U. pustulata*. Sequence divergence of each TE copy from the  
783 corresponding consensus sequence was measured based on the Kimura (K2P) distance  
784 method. The further to the left a peak in the distribution, the younger the corresponding TE  
785 fraction generally is.

786 **Fig. 2** Left: Pattern of genetic structure among populations based on pairwise  $F_{ST}$  genetic  
787 distances calculated on 447,470 polymorphic SNPs. Right: Non-metric multidimensional  
788 scaling (NMDS) ordination plot illustrating population structure based on TE copy insertion  
789 frequencies in 15 populations of *U. pustulata*. IT: Italian gradient, ES: Spanish gradients (i,  
790 ii). The populations from Mediterranean climate (red) and cold temperate climate (blue) form  
791 clusters (with the exception of IT5 and ESii2 which have an intermediate position).

792

**Table 1.** Populations ID, coordinates, elevations and Pool-Seq read number for 15 *U. pustulata* populations along three elevational gradients.

| <b>Country</b> | <b>Population ID</b> | <b>Lat</b> | <b>Long</b> | <b>Elevation<br/>m a.s.l.</b> | <b>Paired-end read #</b> | <b>mean read<br/>length</b> |
|----------------|----------------------|------------|-------------|-------------------------------|--------------------------|-----------------------------|
| Italy          | IT1                  | 40,7577    | 9,0794      | 176                           | 29162770                 | 99,3                        |
|                | IT2                  | 40,7778    | 9,0546      | 297                           | 28279628                 | 99,3                        |
|                | IT3                  | 40,8503    | 9,1119      | 588                           | 26570943                 | 99,4                        |
|                | IT4                  | 40,8568    | 9,134       | 842                           | 31720828                 | 99,4                        |
|                | IT5                  | 40,8573    | 9,1642      | 1125                          | 31755901                 | 99,4                        |
|                | IT6                  | 40,8524    | 9,1732      | 1303                          | 32064853                 | 99,4                        |
| Spain 1        | ESii1                | 40,2028    | -5,2334     | 706                           | 26758269                 | 141,8                       |
|                | ESii2                | 40,2069    | -5,2327     | 887                           | 24295101                 | 141,7                       |
|                | ESii3                | 40,2116    | -5,2337     | 1082                          | 29236274                 | 141,9                       |
|                | ESii4                | 40,2183    | -5,2335     | 1258                          | 33333561                 | 141,6                       |
|                | ESii5                | 40,2253    | -5,2375     | 1480                          | 24672545                 | 141,7                       |
|                | ESii6                | 40,2322    | -5,2389     | 1699                          | 26690508                 | 141,5                       |
| Spain 2        | ESi1                 | 39,9946    | -4,8679     | 477                           | 28862057                 | 99,5                        |
|                | ESi2                 | 40,2899    | -4,9927     | 859                           | 37303042                 | 99,5                        |
|                | ESi3                 | 40,323     | -5,0173     | 1417                          | 35351050                 | 99,5                        |

793

794

**Table 2A.** Summary of class I and II TE elements found in the *U. pustulata* genome.

| class    | Total length | no. copies | no. full length copies | median identity* | median length |
|----------|--------------|------------|------------------------|------------------|---------------|
| class II | 1146170      | 1863       | 156                    | 91,4             | 657,9         |
| class I  | 5118614      | 2902       | 465                    | 90,3             | 1162,5        |
| Unknown  | 731643       | 1191       | 83                     | 88,1             | 323,4         |

**Table 2B.** Summary of TE elements subdivided into superfamilies for the *U. pustulata* genome.

| class        | order | superfamily | no. elements | total length   | no. copies  | no. full length copies | median identity* | median length |
|--------------|-------|-------------|--------------|----------------|-------------|------------------------|------------------|---------------|
| class II     | DHX   | Helitron_01 | 7            | 553513         | 680         | 23                     | 88,7             | 498,6         |
|              | DTA   | HAT         | 1            | 24206          | 80          | 4                      | 89,98            | 186,5         |
|              | DTB   | PiggyBac    | 1            | 12236          | 10          | 4                      | 95,3             | 1481,0        |
|              | DTT   | Tc1Mar      | 4            | 104574         | 139         | 28                     | 89,6             | 1029,4        |
|              | DTX   | TIR         | 18           | 380415         | 824         | 86                     | 92,0             | 648,2         |
|              | DXX   | MITE        | 4            | 71226          | 130         | 11                     | 93,0             | 521,0         |
| class I      | RII   | LINE        | 5            | 317234         | 155         | 33                     | 94,0             | 923,1         |
|              | RLC   | Copia       | 25           | 1333809        | 865         | 166                    | 92,0             | 1350,2        |
|              | RLG   | Gypsy       | 23           | 2904582        | 1296        | 215                    | 89,8             | 1246,0        |
|              | RLX   | LTR         | 15           | 538504         | 550         | 46                     | 86,2             | 942,6         |
|              | RXX   | LARD        | 1            | 20415          | 25          | 1                      | 816,6            | 383           |
|              | RXX   | TRIM        | 1            | 4070           | 11          | 4                      | 96,8             | 126           |
|              | No    | Unknown     | 14           | 731643         | 1191        | 83                     | 88,1             | 323,4         |
| <i>total</i> |       |             | <i>119</i>   | <i>6996427</i> | <i>5956</i> | <i>704</i>             | <i>147,1</i>     | <i>743,0</i>  |

\*Identity= % sequence similarity between TE copy and the respective consensus sequence

795

796

797

**Table 3A.** TE copy insertion in 15 populations of *U. pustulata* (min. physical coverage: 16x).

| TE family | copy no. | %    |
|-----------|----------|------|
| Copia     | 62       | 34,1 |
| TIR       | 31       | 17,0 |
| Unknown   | 23       | 12,6 |
| Helitron  | 22       | 12,1 |
| Gypsy     | 16       | 8,8  |
| LTR       | 10       | 5,5  |
| MITE      | 8        | 4,4  |
| LARD      | 5        | 2,7  |
| TC1Mar    | 2        | 1,1  |
| HAT       | 1        | 0,5  |
| LINE      | 1        | 0,5  |
| Piggybac  | 1        | 0,5  |

**Table 3B.** Polymorphic TE copy insertion in populations.

| TE family | copy no. | %    |
|-----------|----------|------|
| Copia     | 49       | 43,0 |
| TIR       | 22       | 19,3 |
| Unknown   | 13       | 11,4 |
| Helitron  | 10       | 8,8  |
| Gypsy     | 5        | 4,4  |
| LTR       | 5        | 4,4  |
| MITE      | 5        | 4,4  |
| LARD      | 1        | 0,9  |
| TC1Mar    | 2        | 1,8  |
| HAT       | 1        | 0,9  |
| Piggybac  | 1        | 0,9  |

**Table 3C.** hdTEs between *U. pustulata* ecotypes.

| TE family | copy no. | %    |
|-----------|----------|------|
| Copia     | 16       | 57,1 |
| TIR       | 4        | 14,3 |
| Helitron  | 3        | 10,7 |
| Unknown   | 3        | 10,7 |
| MITE      | 1        | 3,6  |
| PiggyBac  | 1        | 3,6  |

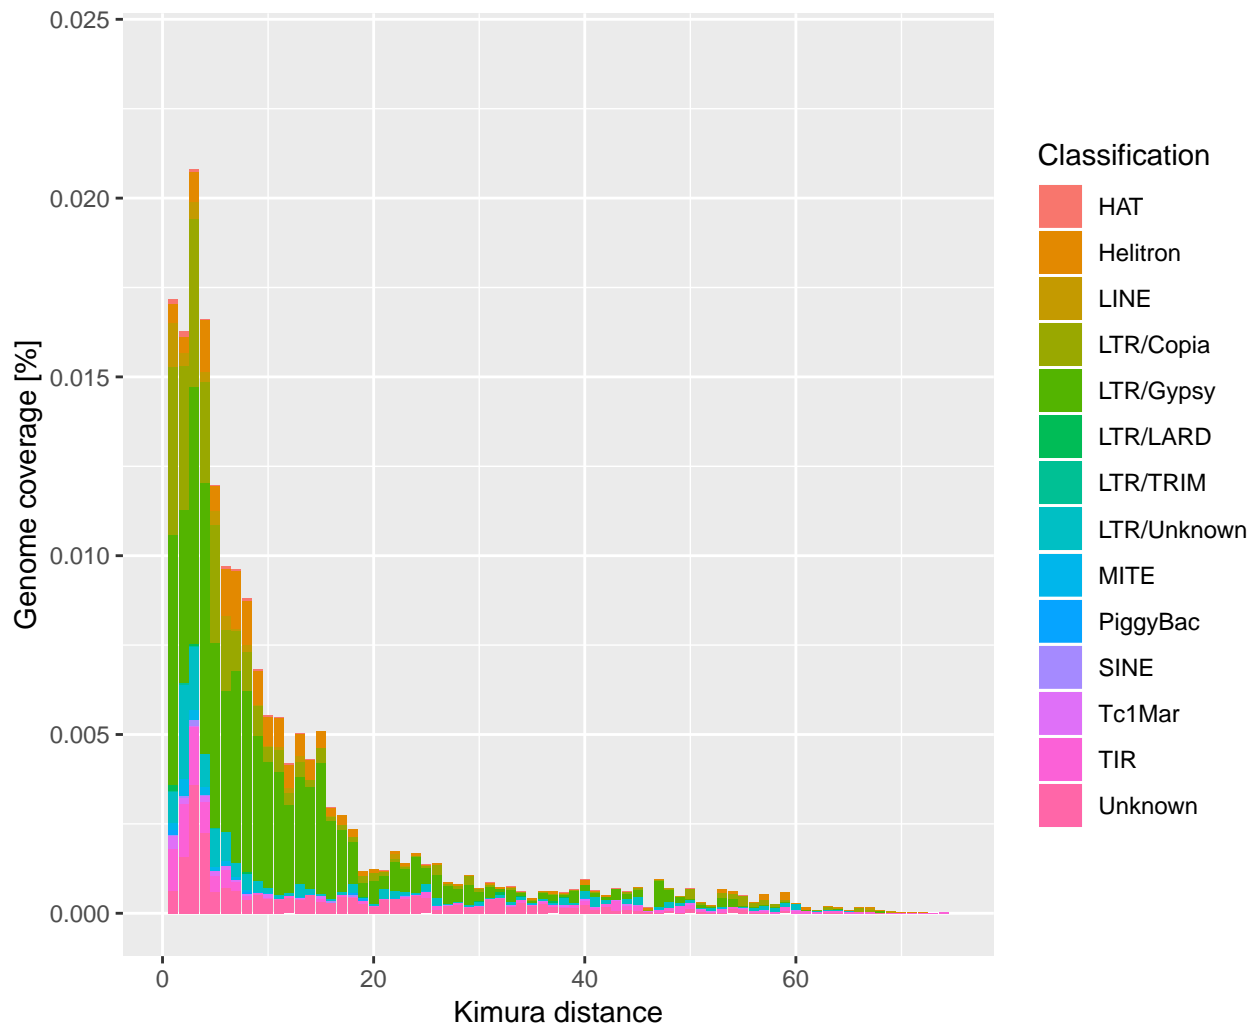



# genome-wide SNPs

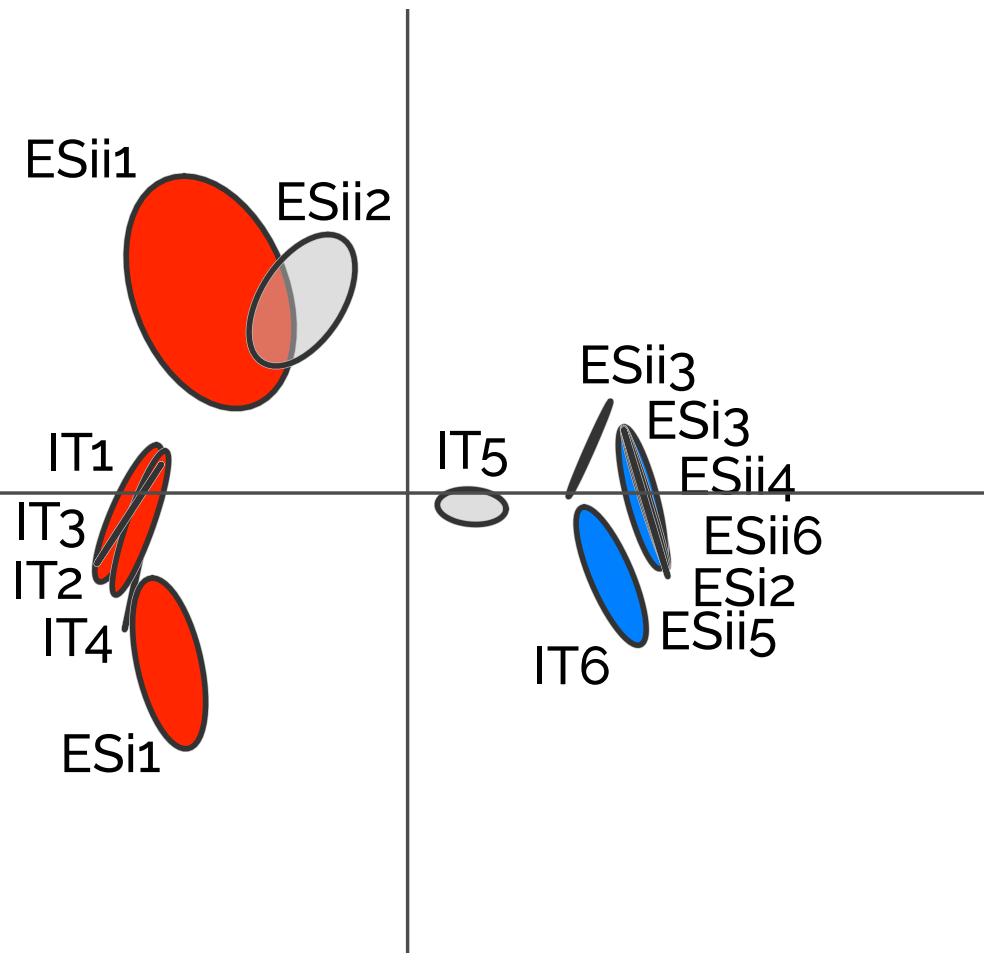

# TE insertions

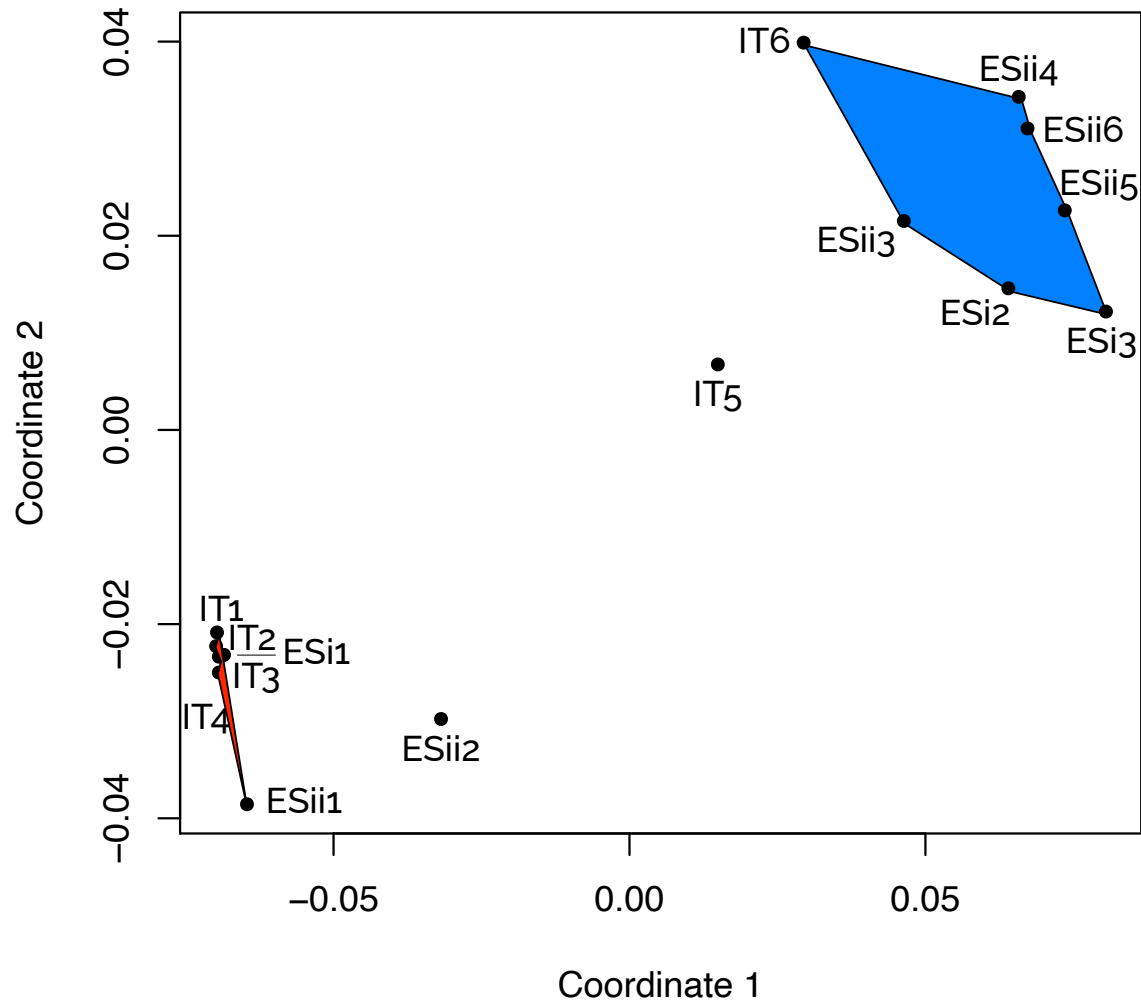

Source: https://www.biorxiv.org/content/10.1101/2021.06.24.448634v1.full.pdf
